# Supplementary material
Source: MDPI journal article supplement (https://www.mdpi.com/2073-4344/11/7/841)
Supplement: s1 [file s1 › catalysts-1292236-supplementary.pdf]

Supporting Information

**Elucidating Synergistic Effects of Different Metal Ratios in Bimetallic Fe/Co-N-C Catalysts for Oxygen Reduction Reaction**

Marius Gollasch, Julia Hülstede, Henrike Schmies, Dana Schonvogel, Peter Wagner, Alexander Dyck and Michael Wark

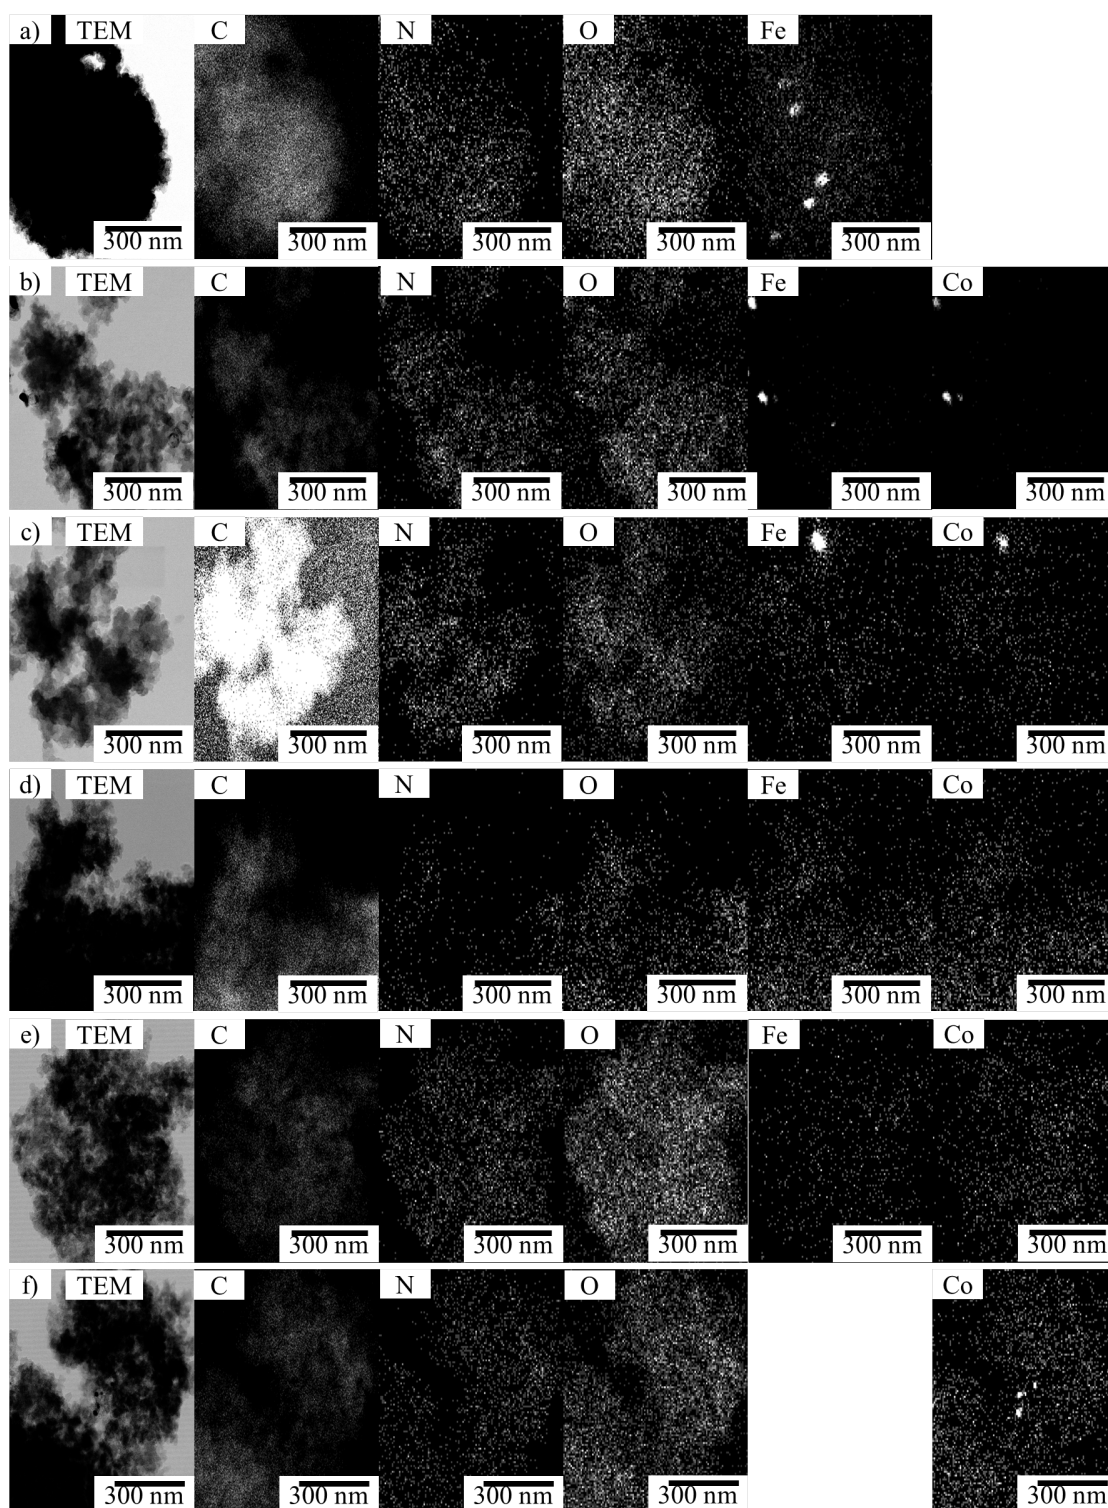

Figure S1: TEM images and EDS.

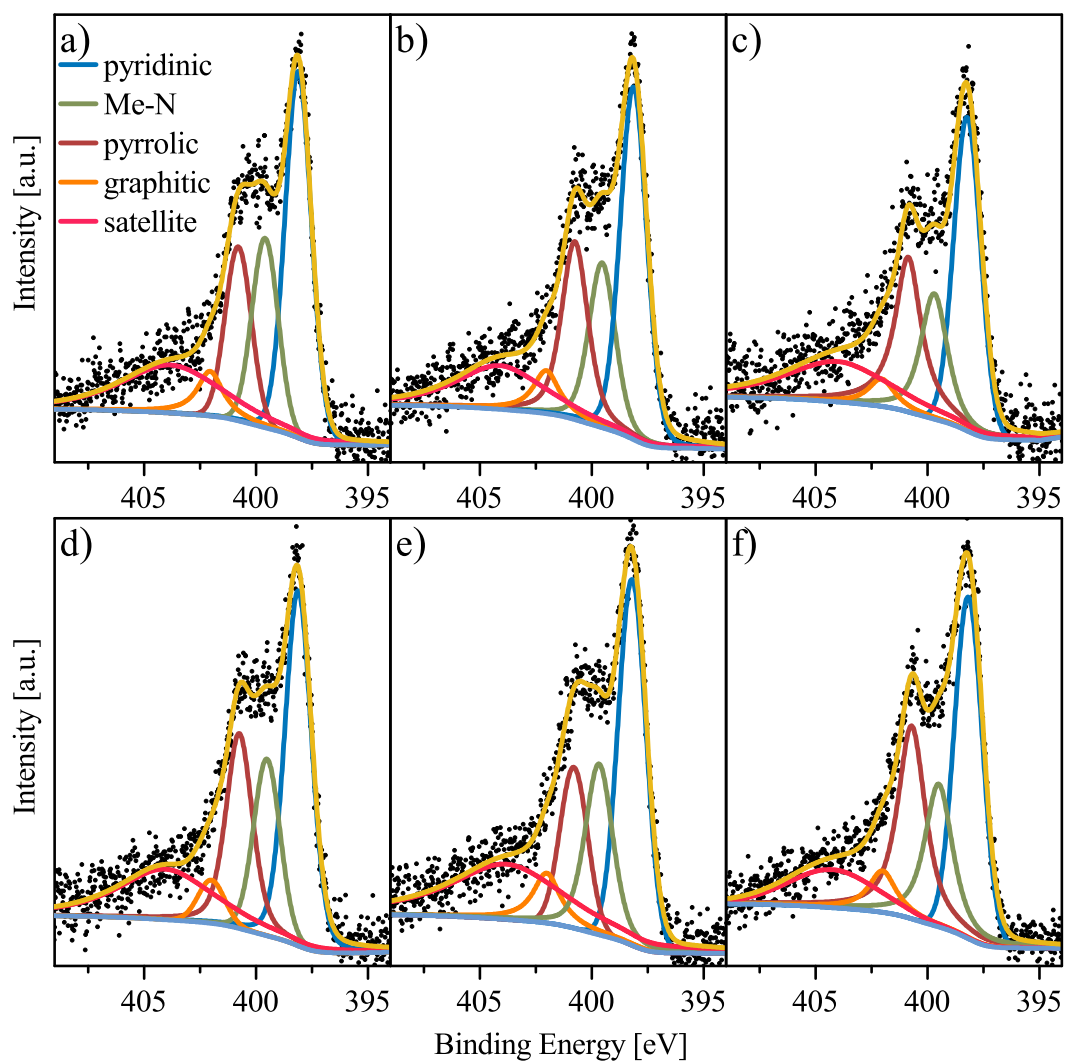

Figure S2: N1s high resolution XP spectra of a) Fe-N-C, b) FeCo-N-C (3:1), c) FeCo-N-C (5:3), d) FeCo-N-C (1:1), e) FeCo-N-C (1:3) and f) Co-N-C.

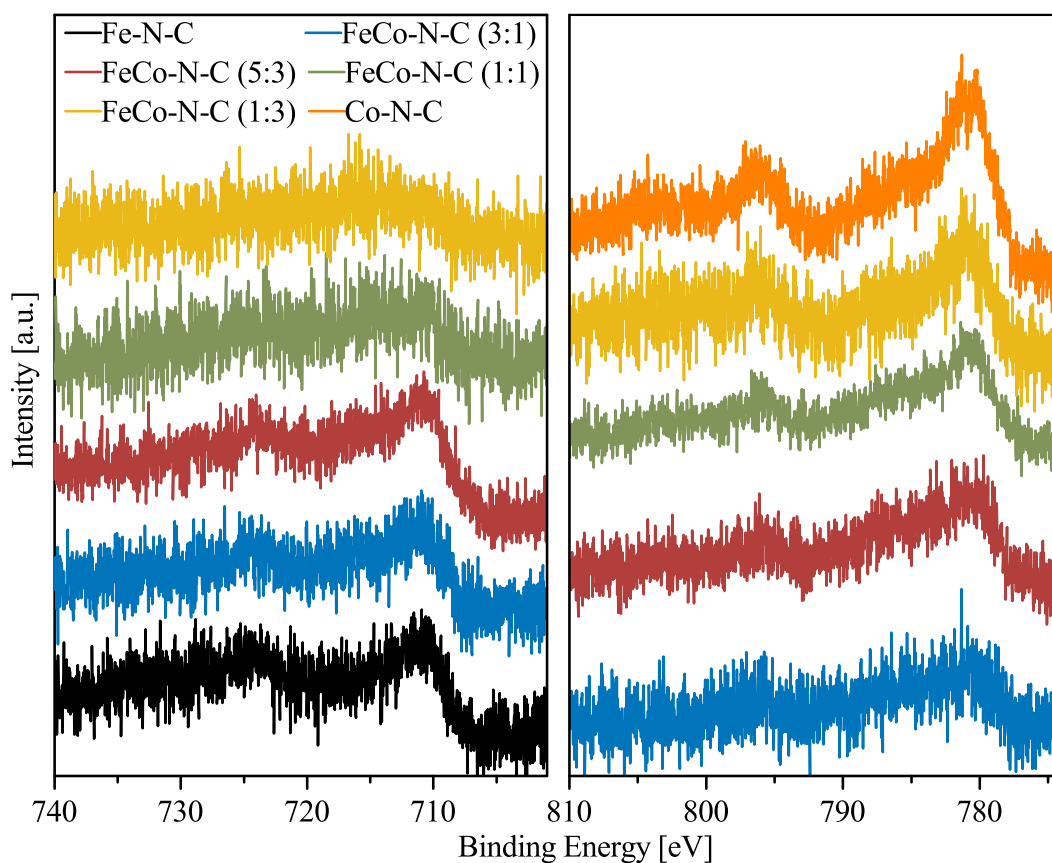

Figure S3: Fe 2p (left) and Co 2p (right) high-resolution XP spectra.

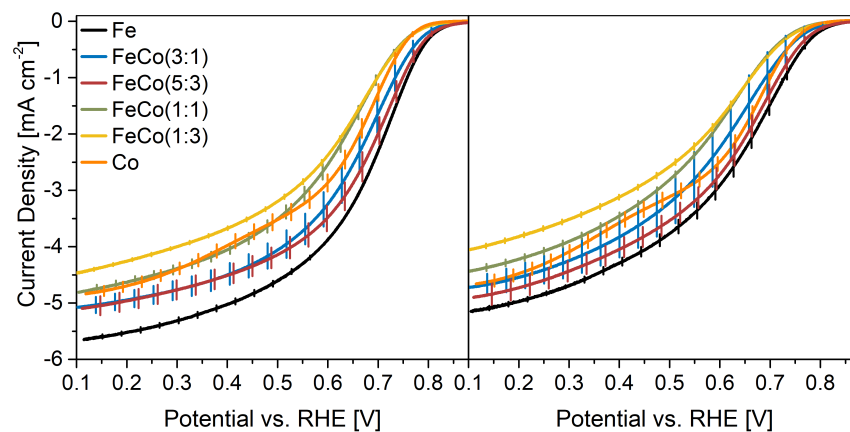

Figure S4: ORR curves for all catalysts with indicated standard deviation before (left) and after (right) the AST.
